# Supplementary material for: Birth by caesarean section and semen quality in adulthood: a Danish population-based cohort study
Source: PubMed Central journal article supplement (PMC10921573; doi:10.1186/s12978-024-01761-w), 2024-03-08

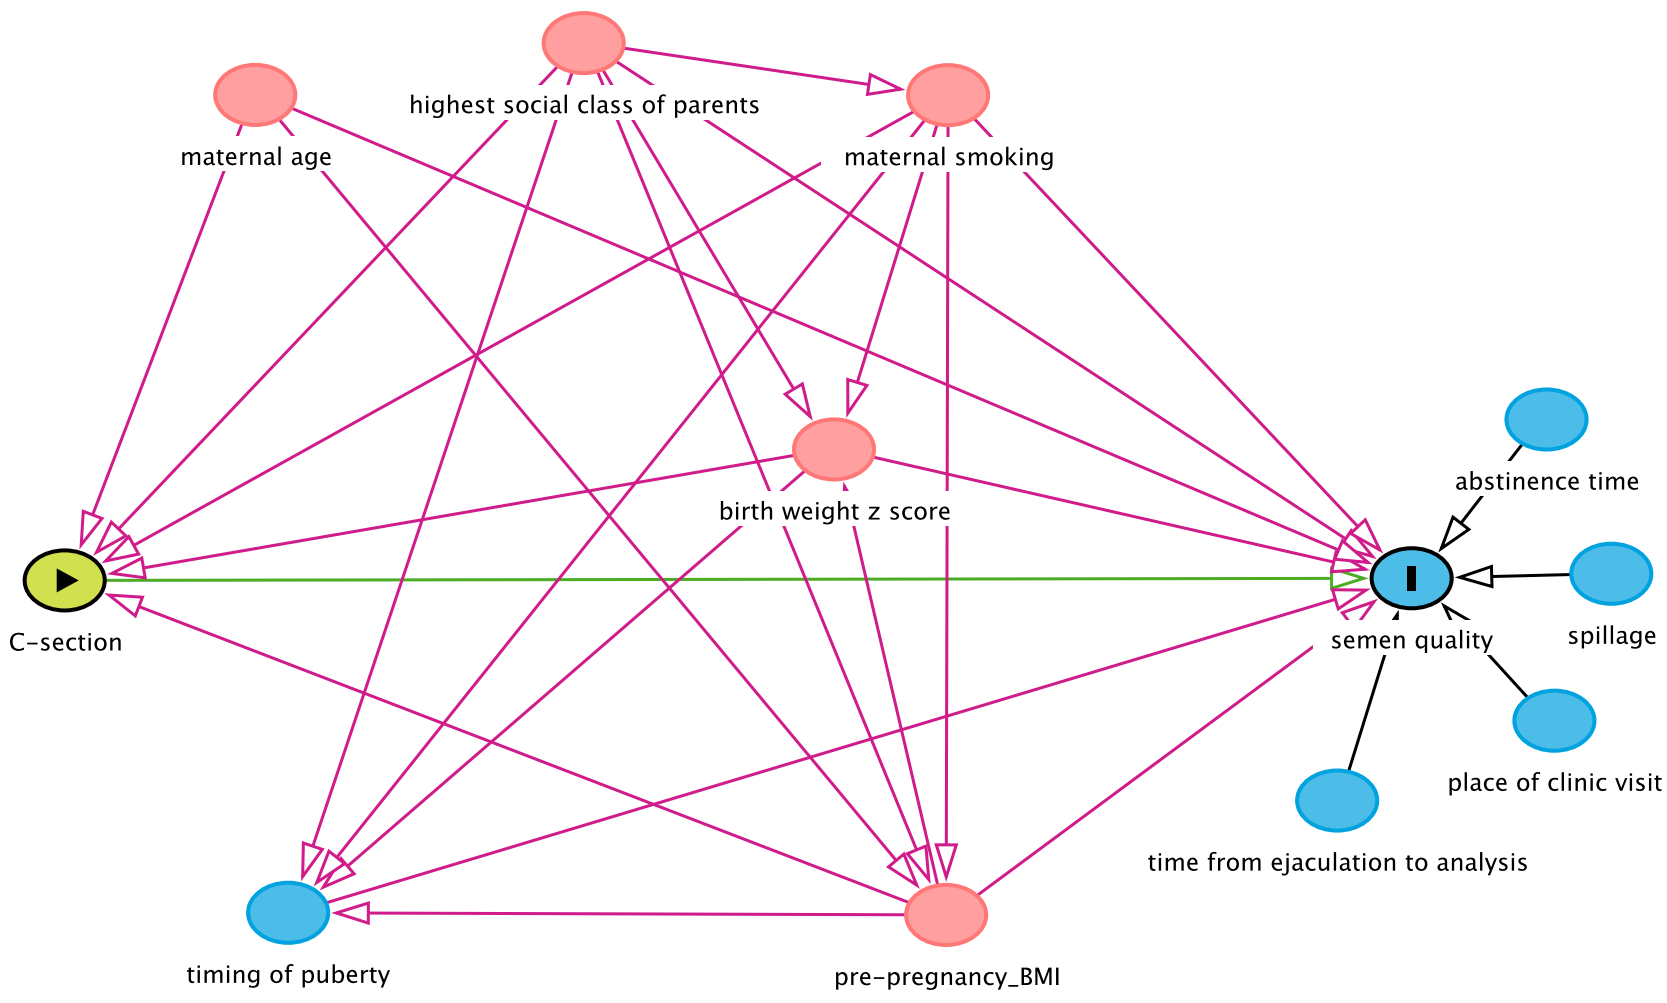

Supplement: 12978_2024_1761_MOESM1_ESM.pdf [file 12978_2024_1761_MOESM1_ESM.pdf]
